# Supplementary material
Source: publisher site journal article supplement (https://www.dovepress.com/article/230849)
Supplement: Supplementary file 1 [file get_supplementary_file.php]

Table S2 The list of the dysregulated phosphoproteins identified in HCC/pcan group.

| **Accession** | **Pan** | **HCC** | **FC**  **(HCC/Pcan)** | ***p* value**  **(HCC/Pcan)** | **significant** | **regulate** |
| --- | --- | --- | --- | --- | --- | --- |
| Q13501 | 0.59 | 1.07 | 1.80 | 0.012 | yes | up |
| P68871 | 1.50 | 0.60 | 0.40 | 0.001 | yes | down |
| P05062 | 1.62 | 0.87 | 0.53 | 0.026 | yes | down |
| P31327 | 1.55 | 0.74 | 0.48 | 0.003 | yes | down |
| Q9HBL0 | 1.12 | 0.89 | 0.80 | 0.010 | yes | down |
| P06748 | 0.81 | 1.05 | 1.30 | 0.003 | yes | up |
| E9PGZ1 | 1.06 | 0.82 | 0.77 | 0.015 | yes | down |
| H7BXR3 | 1.33 | 0.80 | 0.60 | 0.001 | yes | down |
| O60716 | 1.17 | 0.86 | 0.73 | 0.037 | yes | down |
| P07148 | 1.72 | 0.68 | 0.40 | 0.003 | yes | down |
| P60174 | 1.47 | 0.90 | 0.61 | 0.021 | yes | down |
| A0A0D9SFB5 | 1.83 | 0.64 | 0.35 | 0.009 | yes | down |
| Q13283 | 0.81 | 1.10 | 1.35 | 0.019 | yes | up |
| O95210 | 1.62 | 0.75 | 0.46 | 0.000 | yes | down |
| P49006 | 0.91 | 1.32 | 1.45 | 0.031 | yes | up |
| A6NDB9 | 1.22 | 0.91 | 0.75 | 0.030 | yes | down |
| Q9H6F5 | 0.81 | 1.18 | 1.45 | 0.005 | yes | up |
| A0A0C4DGB5 | 1.27 | 0.92 | 0.72 | 0.024 | yes | down |
| P52758 | 1.48 | 0.90 | 0.61 | 0.039 | yes | down |
| Q02818 | 1.72 | 0.85 | 0.50 | 0.011 | yes | down |
| Q14847 | 1.28 | 0.92 | 0.72 | 0.024 | yes | down |
| P17096 | 0.96 | 1.19 | 1.25 | 0.027 | yes | up |
| Q9Y2D5 | 1.27 | 0.95 | 0.75 | 0.039 | yes | down |
| Q13442 | 0.89 | 1.18 | 1.32 | 0.031 | yes | up |
| F5H5P2 | 1.88 | 0.76 | 0.41 | 0.002 | yes | down |
| C9JWC3 | 1.53 | 0.83 | 0.54 | 0.008 | yes | down |
| Q15154 | 0.78 | 1.06 | 1.37 | 0.032 | yes | up |
| Q9UGP4 | 1.30 | 0.84 | 0.65 | 0.037 | yes | down |
| Q16822 | 1.49 | 0.80 | 0.54 | 0.022 | yes | down |
| P20962 | 1.37 | 0.84 | 0.61 | 0.031 | yes | down |
| O76021 | 0.88 | 1.12 | 1.27 | 0.022 | yes | up |
| O75369 | 1.41 | 0.89 | 0.63 | 0.003 | yes | down |
| Q9UN36 | 1.14 | 0.74 | 0.65 | 0.005 | yes | down |
| O60504 | 1.10 | 0.82 | 0.75 | 0.049 | yes | down |
| P02794 | 1.32 | 0.78 | 0.59 | 0.012 | yes | down |
| P16402 | 1.31 | 0.88 | 0.67 | 0.003 | yes | down |
| Q6JBY9 | 1.05 | 0.82 | 0.79 | 0.031 | yes | down |
| Q13131 | 1.25 | 0.82 | 0.65 | 0.004 | yes | down |
| E7EUC7 | 1.24 | 0.86 | 0.69 | 0.036 | yes | down |
| Q14678 | 1.10 | 0.69 | 0.62 | 0.018 | yes | down |
| Q13541 | 0.60 | 1.34 | 2.22 | 0.009 | yes | up |
| P62753 | 1.37 | 0.77 | 0.56 | 0.016 | yes | down |
| Q96HC4 | 1.76 | 0.72 | 0.41 | 0.017 | yes | down |
| P49756 | 0.86 | 1.14 | 1.34 | 0.044 | yes | up |
| Q6UXB4 | 1.23 | 0.75 | 0.62 | 0.038 | yes | down |
| Q53EL6 | 1.10 | 0.83 | 0.75 | 0.014 | yes | down |
| O95049 | 1.08 | 0.81 | 0.74 | 0.003 | yes | down |
| Q0JRZ9 | 1.21 | 0.88 | 0.73 | 0.013 | yes | down |
| P49757 | 1.39 | 0.95 | 0.68 | 0.013 | yes | down |
| O14558 | 1.00 | 0.74 | 0.74 | 0.037 | yes | down |
| Q9NP74 | 1.22 | 0.92 | 0.76 | 0.030 | yes | down |

Table S3 The list of the dysregulated phosphoproteins identified in PVTT/HCC.

| **Accession** | **PVTT** | **HCC** | **FC**  **(PVTT/HCC)** | ***p* value**  **(PVTT/HCC)** | **significant** | **regulate** |
| --- | --- | --- | --- | --- | --- | --- |
| A6NMY6 | 1.20 | 0.90 | 1.34 | 0.040 | yes | up |
| P11047 | 1.08 | 0.87 | 1.24 | 0.040 | yes | up |
| O75347 | 0.96 | 1.37 | 0.70 | 0.036 | yes | down |
| Q9Y2V2 | 1.08 | 1.32 | 0.82 | 0.036 | yes | down |
| P24539 | 1.32 | 1.02 | 1.30 | 0.029 | yes | up |
| Q02878 | 1.11 | 0.91 | 1.22 | 0.025 | yes | up |
| Q12906 | 1.15 | 0.90 | 1.28 | 0.019 | yes | up |
| P02511 | 1.23 | 0.71 | 1.75 | 0.011 | yes | up |
| P84098 | 1.39 | 1.10 | 1.27 | 0.010 | yes | up |
| Q14764 | 1.19 | 0.88 | 1.35 | 0.009 | yes | up |

Table S4 The list of the dysregulated phosphoproteins identified in PVTT/Pcan group.

| **Accession** | **Pan** | **PVTT** | **FC**  **(PVTT/Pcan)** | ***p* value**  **(PVTT/Pcan)** | **significant** | **regulate** |
| --- | --- | --- | --- | --- | --- | --- |
| Q09666 | 1.12 | 0.90 | 0.80 | 0.006 | yes | down |
| Q9C0C2 | 1.06 | 0.85 | 0.80 | 0.014 | yes | down |
| Q13501 | 0.59 | 1.11 | 1.87 | 0.047 | yes | up |
| P51858 | 1.17 | 0.86 | 0.73 | 0.015 | yes | down |
| P05062 | 1.62 | 0.86 | 0.53 | 0.020 | yes | down |
| P31327 | 1.55 | 0.79 | 0.51 | 0.005 | yes | down |
| P06748 | 0.81 | 1.06 | 1.30 | 0.027 | yes | up |
| H7BXR3 | 1.33 | 0.81 | 0.61 | 0.001 | yes | down |
| P07148 | 1.72 | 0.86 | 0.50 | 0.021 | yes | down |
| P33241 | 1.11 | 0.89 | 0.80 | 0.048 | yes | down |
| P60174 | 1.47 | 0.84 | 0.57 | 0.015 | yes | down |
| A0A0D9SFB5 | 1.83 | 0.71 | 0.39 | 0.013 | yes | down |
| Q96JY6 | 1.11 | 0.83 | 0.75 | 0.000 | yes | down |
| E7ETY2 | 0.82 | 1.20 | 1.46 | 0.045 | yes | up |
| P08621 | 0.86 | 1.04 | 1.21 | 0.010 | yes | up |
| O95210 | 1.62 | 0.66 | 0.41 | 0.000 | yes | down |
| A6NDB9 | 1.22 | 0.83 | 0.68 | 0.003 | yes | down |
| Q9H6F5 | 0.81 | 1.07 | 1.31 | 0.007 | yes | up |
| O14639 | 1.06 | 0.86 | 0.81 | 0.036 | yes | down |
| A0A0C4DGB5 | 1.27 | 0.95 | 0.74 | 0.009 | yes | down |
| P52758 | 1.48 | 0.77 | 0.52 | 0.012 | yes | down |
| Q02818 | 1.72 | 0.72 | 0.42 | 0.003 | yes | down |
| Q14847 | 1.28 | 0.95 | 0.74 | 0.005 | yes | down |
| O43741 | 1.14 | 0.87 | 0.76 | 0.021 | yes | down |
| P49736 | 0.73 | 0.96 | 1.33 | 0.020 | yes | up |
| Q13523 | 0.93 | 1.19 | 1.29 | 0.044 | yes | up |
| A0A0D9SG04 | 1.16 | 0.77 | 0.66 | 0.039 | yes | down |
| Q9Y2D5 | 1.27 | 0.95 | 0.75 | 0.008 | yes | down |
| O43294 | 1.08 | 0.77 | 0.72 | 0.017 | yes | down |
| F5H5P2 | 1.88 | 0.77 | 0.41 | 0.002 | yes | down |
| J3KN01 | 1.06 | 0.87 | 0.82 | 0.004 | yes | down |
| Q15811 | 1.21 | 0.81 | 0.66 | 0.005 | yes | down |
| Q92934 | 1.25 | 0.88 | 0.70 | 0.036 | yes | down |
| C9JWC3 | 1.53 | 0.82 | 0.54 | 0.007 | yes | down |
| O00499 | 0.97 | 0.80 | 0.82 | 0.007 | yes | down |
| Q9UGP4 | 1.30 | 0.98 | 0.76 | 0.031 | yes | down |
| Q16822 | 1.49 | 0.79 | 0.53 | 0.024 | yes | down |
| Q0ZGT2 | 1.23 | 0.80 | 0.65 | 0.040 | yes | down |
| Q00587 | 1.09 | 0.87 | 0.80 | 0.048 | yes | down |
| P20962 | 1.37 | 0.85 | 0.62 | 0.028 | yes | down |
| Q9Y2V2 | 1.37 | 0.74 | 0.54 | 0.043 | yes | down |
| O76021 | 0.88 | 1.16 | 1.31 | 0.025 | yes | up |
| Q0VF96 | 1.12 | 0.83 | 0.74 | 0.044 | yes | down |
| P42566 | 1.01 | 0.81 | 0.80 | 0.047 | yes | down |
| Q01105 | 0.87 | 1.14 | 1.32 | 0.038 | yes | up |
| O95400 | 0.95 | 1.31 | 1.38 | 0.001 | yes | up |
| Q96KR1 | 0.83 | 1.16 | 1.40 | 0.007 | yes | up |
| Q15233 | 0.78 | 1.30 | 1.66 | 0.001 | yes | up |
| O14974 | 1.01 | 0.72 | 0.72 | 0.005 | yes | down |
| Q5JSH3 | 1.10 | 0.85 | 0.77 | 0.019 | yes | down |
| O75369 | 1.41 | 0.89 | 0.63 | 0.001 | yes | down |
| Q9UN36 | 1.14 | 0.79 | 0.70 | 0.004 | yes | down |
| Q08495 | 1.29 | 0.90 | 0.70 | 0.006 | yes | down |
| P02794 | 1.32 | 0.79 | 0.60 | 0.004 | yes | down |
| P16402 | 1.31 | 0.82 | 0.62 | 0.003 | yes | down |
| P43487 | 1.36 | 0.87 | 0.64 | 0.048 | yes | down |
| Q6JBY9 | 1.05 | 0.86 | 0.82 | 0.026 | yes | down |
| Q13131 | 1.25 | 0.84 | 0.67 | 0.002 | yes | down |
| Q16643 | 0.82 | 1.03 | 1.25 | 0.043 | yes | up |
| Q8ND30 | 1.16 | 0.83 | 0.72 | 0.018 | yes | down |
| Q8NDI1 | 1.23 | 0.92 | 0.75 | 0.016 | yes | down |
| P98082 | 0.73 | 0.99 | 1.36 | 0.026 | yes | up |
| P23396 | 0.83 | 1.32 | 1.59 | 0.034 | yes | up |
| Q86V48 | 0.90 | 1.23 | 1.37 | 0.007 | yes | up |
| Q9Y4H2 | 1.38 | 0.93 | 0.67 | 0.026 | yes | down |
| Q8TD55 | 1.01 | 0.76 | 0.76 | 0.031 | yes | down |
| P49585 | 0.84 | 1.07 | 1.28 | 0.025 | yes | up |
| Q14678 | 1.10 | 0.76 | 0.69 | 0.036 | yes | down |
| Q13541 | 0.60 | 0.98 | 1.63 | 0.038 | yes | up |
| P49840 | 0.84 | 1.09 | 1.31 | 0.044 | yes | up |
| Q96HC4 | 1.76 | 0.70 | 0.40 | 0.012 | yes | down |
| Q92522 | 0.70 | 0.93 | 1.33 | 0.021 | yes | up |
| A0A0B4J1V8 | 0.78 | 1.03 | 1.31 | 0.017 | yes | up |
| Q6UXB4 | 1.23 | 0.72 | 0.59 | 0.005 | yes | down |
| Q9BZZ5 | 0.75 | 1.21 | 1.62 | 0.001 | yes | up |
| Q92625 | 1.11 | 0.86 | 0.78 | 0.026 | yes | down |
| Q0JRZ9 | 1.21 | 0.98 | 0.81 | 0.032 | yes | down |
| P49757 | 1.39 | 0.94 | 0.68 | 0.013 | yes | down |
| Q8N5F7 | 0.61 | 0.88 | 1.44 | 0.039 | yes | up |
| O75909 | 0.98 | 1.19 | 1.22 | 0.018 | yes | up |
